# Supplementary material
Source: MDPI journal article supplement (https://www.mdpi.com/1424-8247/15/3/363)
Supplement: s1 [file s1]

## SUPPLEMENTARY MATERIALS

# Mitophagy Mediates the Beige to White Transition of Human Primary Subcutaneous Adipocytes Ex Vivo

Attila Vámos <sup>1,2,†</sup>, Abhirup Shaw <sup>1,2,†</sup>, Klára Varga <sup>1,2</sup>, István Csomós <sup>3</sup>, Gábor Mocsár <sup>3</sup>,  
Zoltán Balajthy <sup>1</sup>, Cecília Lányi <sup>4</sup>, Zsolt Bacso <sup>3,5</sup>, Mária Szatmári-Tóth <sup>1,‡</sup> and Endre Kristóf <sup>1,\*,‡</sup>

<sup>1</sup> Laboratory of Cell Biochemistry, Department of Biochemistry and Molecular Biology, Faculty of Medicine, University of Debrecen, H-4032 Debrecen, Hungary; [vamos.attila@med.unideb.hu](mailto:vamos.attila@med.unideb.hu) (A.V.); [abhirup.shaw@med.unideb.hu](mailto:abhirup.shaw@med.unideb.hu) (A.S.); [klaravarga95@gmail.com](mailto:klaravarga95@gmail.com) (K.V.); [balajthy@med.unideb.hu](mailto:balajthy@med.unideb.hu) (Z.B.); [szatmari-toth.maria@med.unideb.hu](mailto:szatmari-toth.maria@med.unideb.hu) (M.S.-T.)

<sup>2</sup> Doctoral School of Molecular Cell and Immune Biology, University of Debrecen, H-4032 Debrecen, Hungary

<sup>3</sup> Department of Biophysics and Cell Biology, Faculty of Medicine, University of Debrecen, H-4032 Debrecen, Hungary; [csomos.istvan@med.unideb.hu](mailto:csomos.istvan@med.unideb.hu) (I.C.); [mocsgab@med.unideb.hu](mailto:mocsgab@med.unideb.hu) (G.M.); [bacso@med.unideb.hu](mailto:bacso@med.unideb.hu) (Z.B.)

<sup>4</sup> Laser Clinic, H-1012 Budapest, Hungary; [lezerklinika@gmail.com](mailto:lezerklinika@gmail.com)

<sup>5</sup> Faculty of Pharmacy, University of Debrecen, H-4032 Debrecen, Hungary

\* Correspondence: [kristof.endre@med.unideb.hu](mailto:kristof.endre@med.unideb.hu); Tel.: +36-52-416-432

† These authors have contributed equally to this work.

‡ These authors have contributed equally to this work.

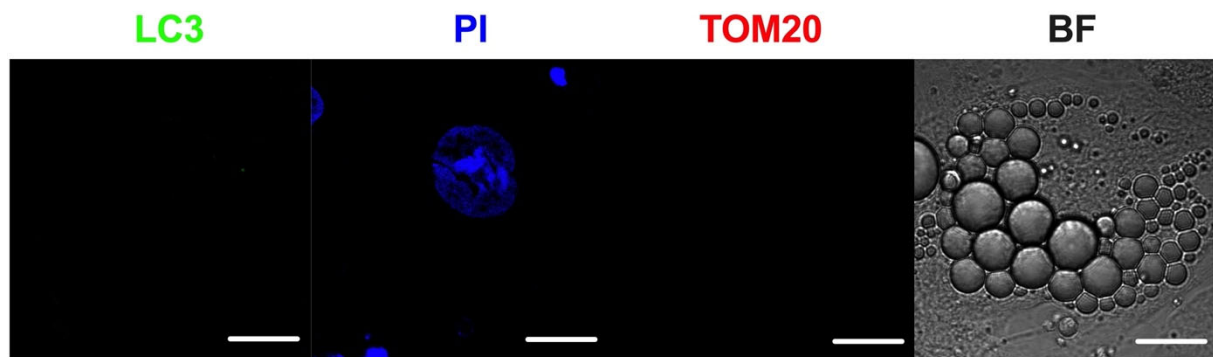

**Figure S1: Secondary antibody control images showing the specificity of the antibodies used for LC3 and TOM20 immunostaining.** PI labels the nucleus. BF represents brightfield image. Scalebars represent 10 $\mu$ m.

**Table S1: Table listing all gene expression assays used in the study**

| <b>Gene name</b> | <b>Assay ID</b> |
|------------------|-----------------|
| <i>UCP1</i>      | Hs00222453_m1   |
| <i>PPARGC1A</i>  | Hs01016719_m1   |
| <i>GAPDH</i>     | Hs99999905_m1   |
| <i>PARK2</i>     | Hs01038322_m1   |
| <i>SQSTM1</i>    | Hs00177654_m1   |
| <i>OPTN</i>      | Hs00184221_m1   |
| <i>NDP52</i>     | Hs00977443_m1   |
| <i>BNIP3</i>     | Hs00969291_m1   |
| <i>BNIP3L</i>    | Hs00188949_m1   |
| <i>FKBP8</i>     | Hs01014664_m1   |
| <i>BCL2L13</i>   | Hs00209789_m1   |
| <i>FUNDC1</i>    | Hs00697693_m1   |
| <i>CIDEA</i>     | Hs00154455_m1   |
| <i>LEP</i>       | Hs00174877_m1   |
